# Supplementary material
Source: PubMed Central journal article supplement (PMC2628292)
Supplement: NIHMS84533-supplement-01.pdf [file NIHMS84533-supplement-01.pdf]

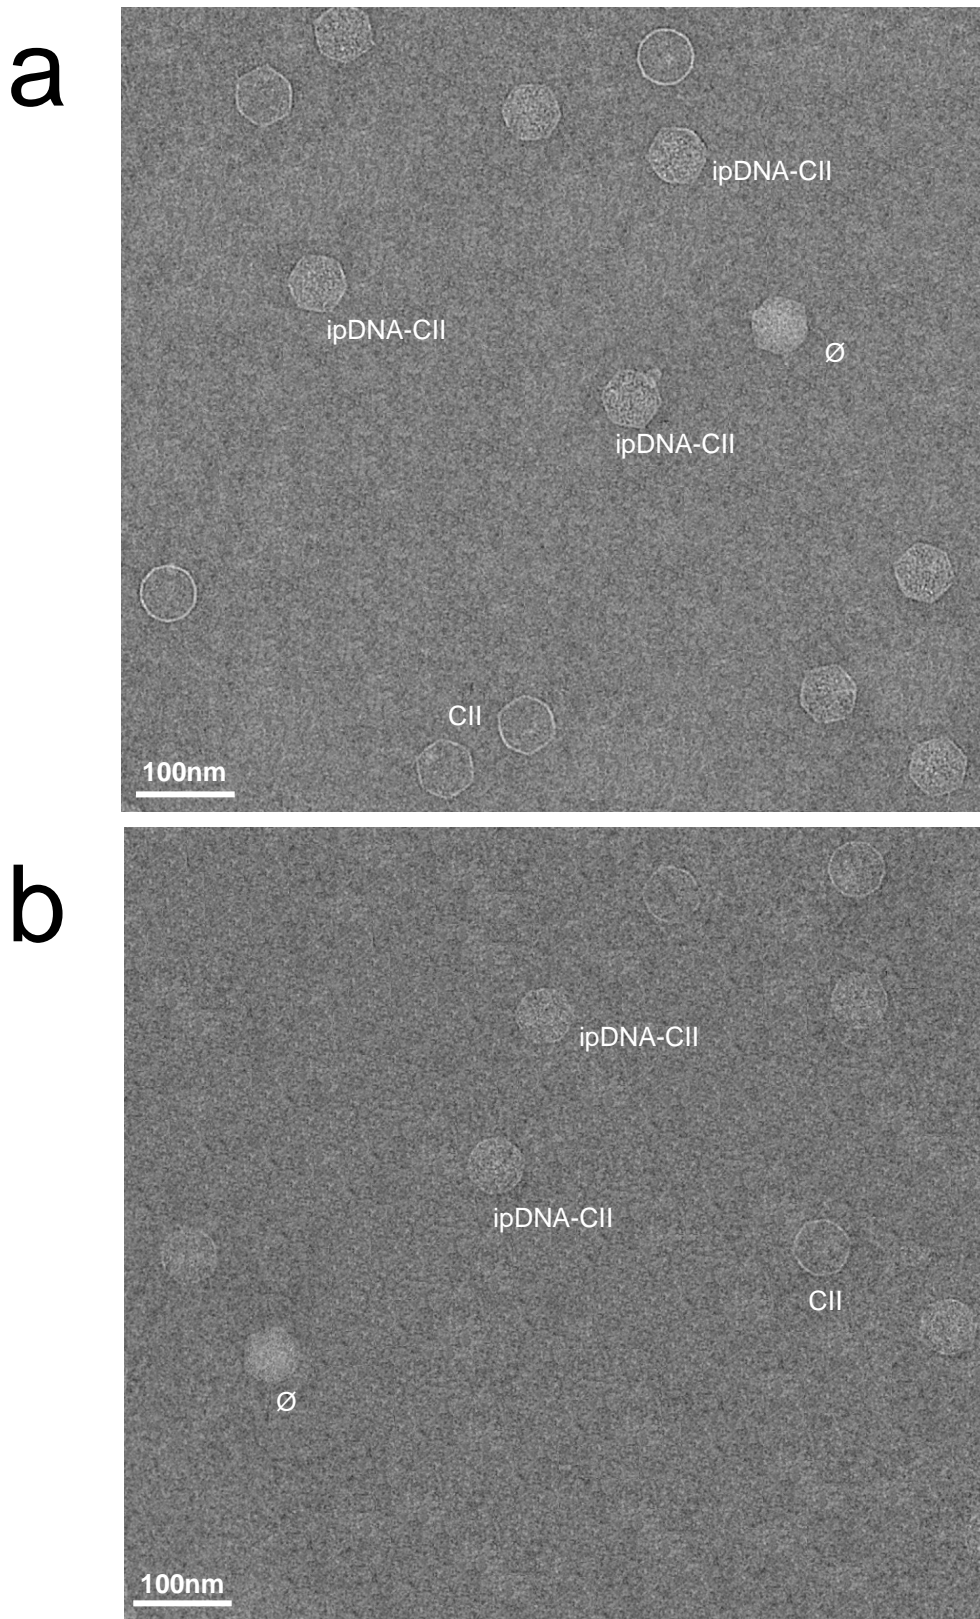

**Supplementary Figure 1.** Cryo-electron microscopy at different defocus values. Fields are shown of 10.6 kb ipDNA-capsids imaged at (a) 3.2  $\mu\text{m}$  defocus, and (b) 1.3  $\mu\text{m}$  defocus. The length of the bar is 100 nm. At each of the different defocus values shown in this figure and in Figure 5b, particles of three types of capsids (capsid II, ipDNA-capsid, and phage) could be identified based on the contents inside the capsid shell.
