# Supplementary material
Source: PubMed Central journal article supplement (PMC2628292)
Supplement: NIHMS84533-supplement-04.pdf [file NIHMS84533-supplement-04.pdf]

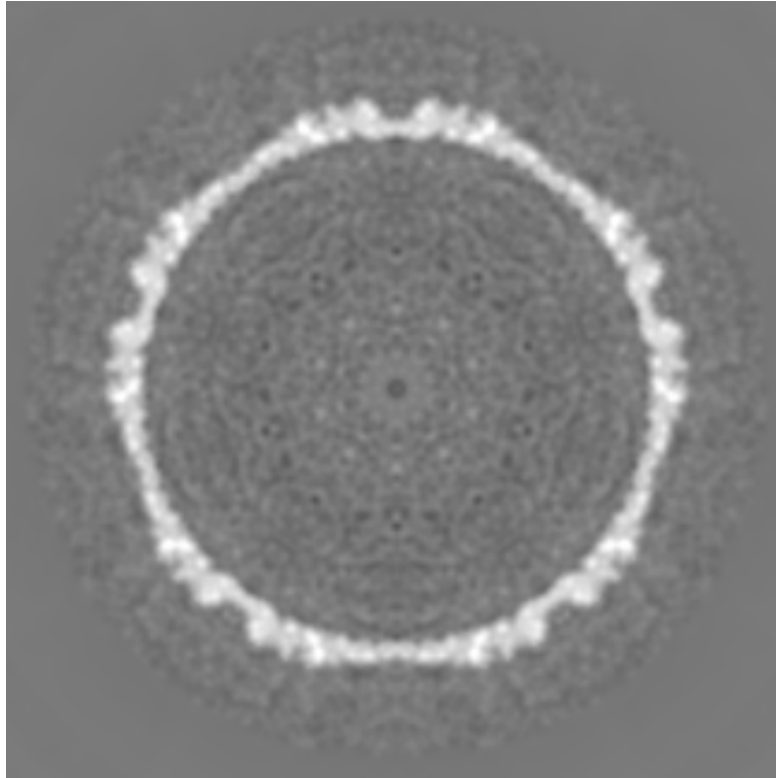

**Supplementary Figure 4.** Central cross sectional view of a 3-D reconstruction of the empty capsid II particles from the 22 kb ipDNA-capsid fraction. Independent *de novo* reconstruction was obtained of the capsid II particles from the same set of micrographs used for the 22kb ipDNA-capsid particle reconstruction in Figure 7g. The number of particles used for the empty capsid II reconstruction (76) was the same as the number used for the 22kb ipDNA-capsid reconstruction. The lack of a DNA ring in this control 3-D reconstruction indicates that the ring structure in Figure 7g is due to the ordered 22kb ipDNA, not CTF artifact.
